# Supplementary material
Source: MDPI journal article supplement (https://www.mdpi.com/2075-4701/12/11/1989)
Supplement: s1 [file s1 › metals-2010659-SM.pdf]

# Supplementary Materials for ‘Atomistic Investigation of Titanium Carbide $\text{Ti}_8\text{C}_5$ under Impact Loading’

Kang Xia <sup>1,2,\*</sup>, Haifei Zhan <sup>2,3</sup>, Jianli Shao <sup>4</sup>, Jiaqiu Wang <sup>2</sup>, Zhuoqun Zheng <sup>5</sup>, Xinjie Zhang <sup>1</sup> and Zhiyong Li <sup>2</sup>

<sup>1</sup> College of Mechanical & Electrical Engineering, HoHai University, Nanjing 210098, China

<sup>2</sup> School of Mechanical, Medical and Process Engineering, Queensland University of Technology (QUT), Brisbane QLD 4001, Australia

<sup>3</sup> College of Civil Engineering and Architecture, Zhejiang University, Hangzhou 310058, China

<sup>4</sup> State Key Laboratory of Explosion Science and Technology, Beijing Institute of Technology, Beijing 100081, China

<sup>5</sup> State Key Laboratory of Mechanics and Control of Mechanical Structures, Nanjing University of Aeronautics and Astronautics Nanjing 210016, China

\* Correspondence: xiak@hhu.edu.cn

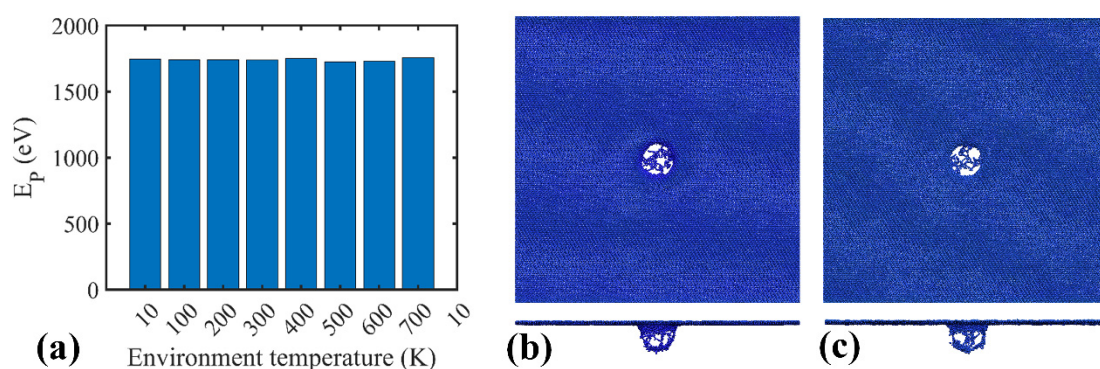

Figure S1. The penetration profile for  $\text{Ti}_8\text{C}_5$  nanosheet subjected to impact velocity of 3 km/s. (a) Penetration energy of  $\text{Ti}_8\text{C}_5$  nanosheet with environment temperature up to 700 K. (b)  $\text{Ti}_8\text{C}_5$  nanosheet deformation with environment temperature of 10 K at simulation time of 2.8 ps. (c)  $\text{Ti}_8\text{C}_5$  nanosheet deformation with environment temperature of 700 K at simulation time of 2.8 ps.
